# Supplementary material for: Electric field-responsive photoluminescence color switching and reversible propertiesviaTb/Eu co-doped ergodic relaxor ferroelectrics
Source: Royal Society of Chemistry journal article supplement (doi:10.1039/c9cp00324j), 2019-01-01
Supplement: c9cp00324j1.pdf [file c9cp00324j1.pdf]

Supporting Information

**Electric field-responsive photoluminescence color switching and reversible properties via  
Tb/Eu co-doped ergodic relaxor ferroelectrics**

*Hailing Sun, Yi Lok Chan, K.W. Kwok\**

Department of Applied Physics, The Hong Kong Polytechnic University,  
Kowloon, Hong Kong, China

\*Correspondence and requests for materials should be addressed to K.W.K. (email:  
apkwkwok@polyu.edu.hk). Fax: (852) 2333 7629. Tel.: (852) 53404890.

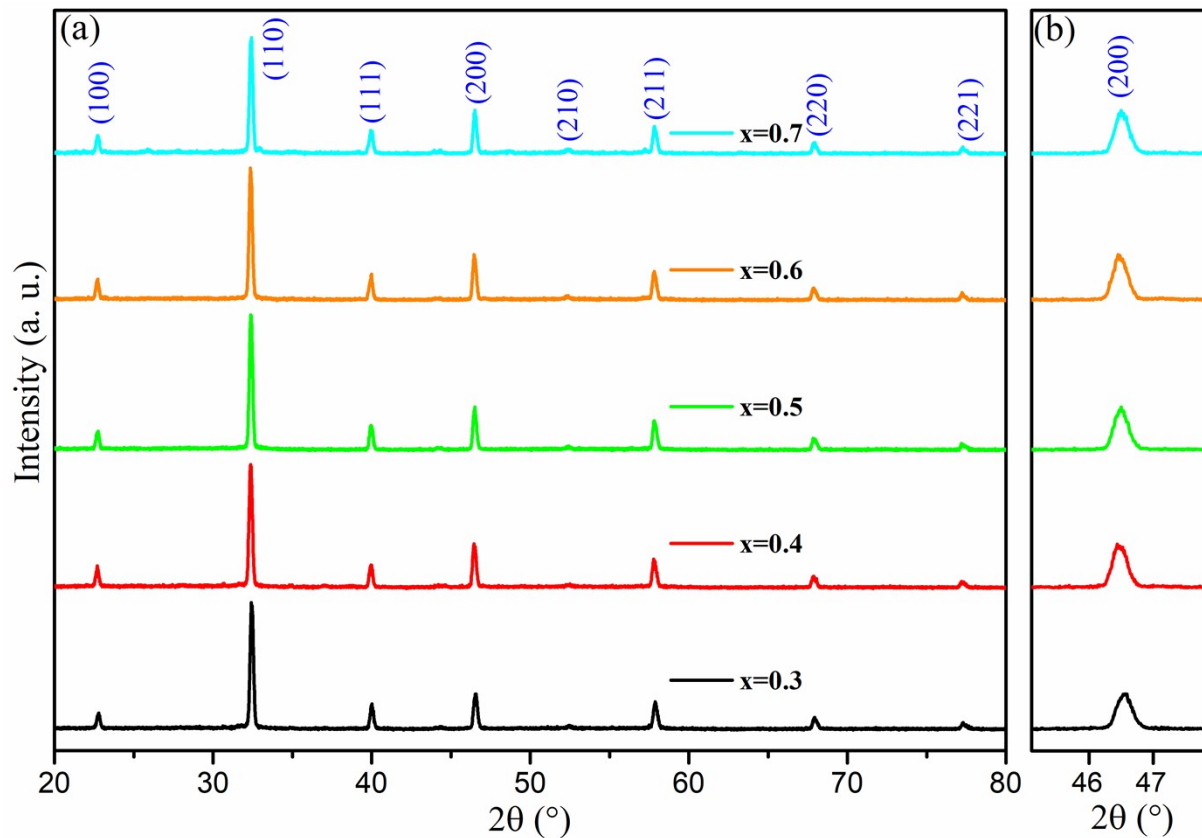

Figure S1 (a) General XRD patterns for the BNT6BT-Tb/Eu-x ceramics, (b) enlarged inspection of the XRD characteristic diffraction peak labeled as {200}.

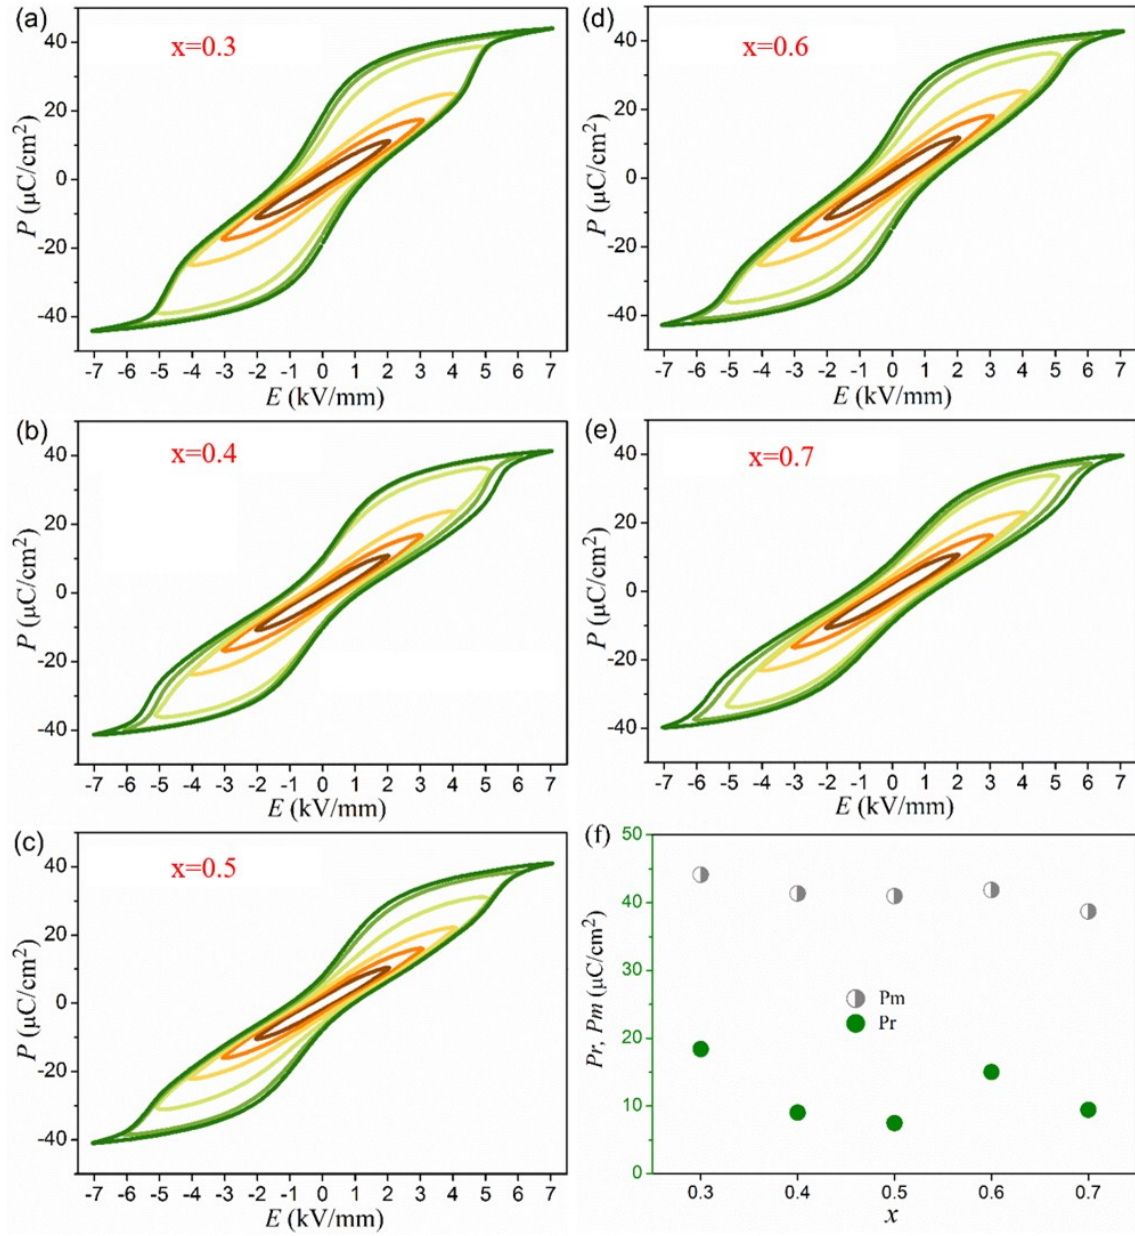

Figure S2 The polarization hysteresis ( $P$ - $E$ ) loops for BNT6BT-Tb/Eu- $x$  ceramics (a-e)  $x=0.3$ -0.7; (f) maximum polarization  $P_m$  and remanent polarization  $P_r$  as functions of  $x$ .

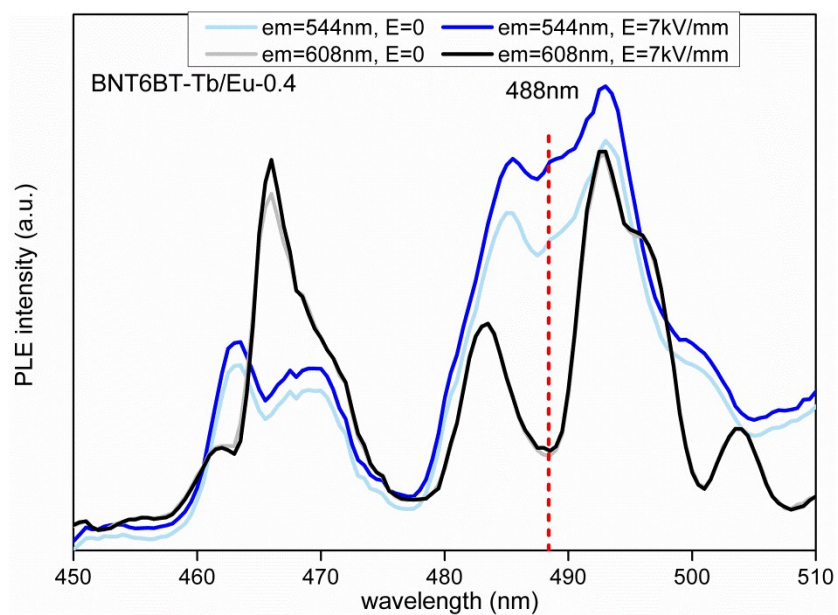

Figure S3 Effects of electric field on PLE spectra of  $x=0.4$  sample under 544nm and 608nm absorption.
